# Supplementary material for: Novel therapeutics for coronary artery disease from genome-wide association study data
Source: PubMed Central journal article supplement (PMC4460746; doi:10.1186/1755-8794-8-s2-s1), 2015-05-29
Supplement: 1755-8794-8-S2-S1-S1.pdf [file 1755-8794-8-S2-S1-S1.pdf]

**Table S1 – Known targets of CAD**

| <b>Known targets of CAD not predicted by <i>Gentrepid</i></b> | <b>Known targets of CAD present in six search spaces, not predicted by <i>Gentrepid</i></b> |
|---------------------------------------------------------------|---------------------------------------------------------------------------------------------|
| CYP2C19                                                       | SERPINA5                                                                                    |
| P2RY12                                                        | GUCY1A2                                                                                     |
| ABCB11                                                        | P2RY12                                                                                      |
| PLA2G2A                                                       | PCSK9                                                                                       |
| MAPK12                                                        |                                                                                             |
| F9                                                            |                                                                                             |
| PCSK9                                                         |                                                                                             |
| ALOX5                                                         |                                                                                             |
| NPR1                                                          |                                                                                             |
| GUCY1A2                                                       |                                                                                             |
| ADRB1                                                         |                                                                                             |
| SERPINC1                                                      |                                                                                             |
| PRSS1                                                         |                                                                                             |
| PLAU                                                          |                                                                                             |
| SERPINE1                                                      |                                                                                             |
| SERPINB2                                                      |                                                                                             |
| SERPINA5                                                      |                                                                                             |
| LRP2                                                          |                                                                                             |
| ST14                                                          |                                                                                             |
| ADRB2                                                         |                                                                                             |
| ADRB3                                                         |                                                                                             |
| F10                                                           |                                                                                             |
| SELP                                                          |                                                                                             |
| CTRB1                                                         |                                                                                             |
| KLK1                                                          |                                                                                             |
| HMGCR                                                         |                                                                                             |
| ITGAL                                                         |                                                                                             |
| HDAC2                                                         |                                                                                             |
| DPP4                                                          |                                                                                             |
| AHR                                                           |                                                                                             |

Figure S1 - ROC curves

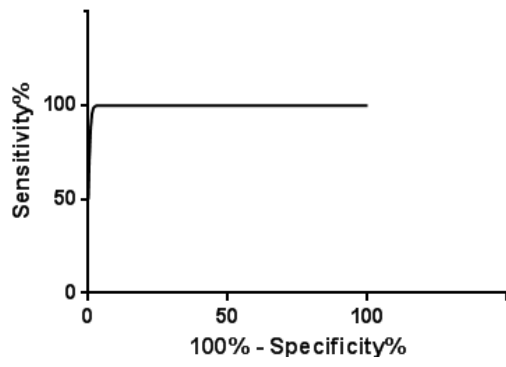

**A**

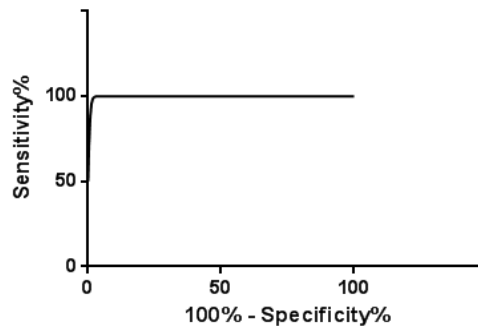

**B**
